# Supplementary material for: A Systematic Review of Surgical Management Strategies in the Treatment of Peritoneal Carcinomatosis of Neuroendocrine Origin
Source: MDPI journal article supplement (doi:10.3390/curroncol30070466), 2023-07-01
Supplement: s1 [file s1]

*Quality Assessment:*
